# Supplementary material
Source: PubMed Central journal article supplement (PMC6168417)

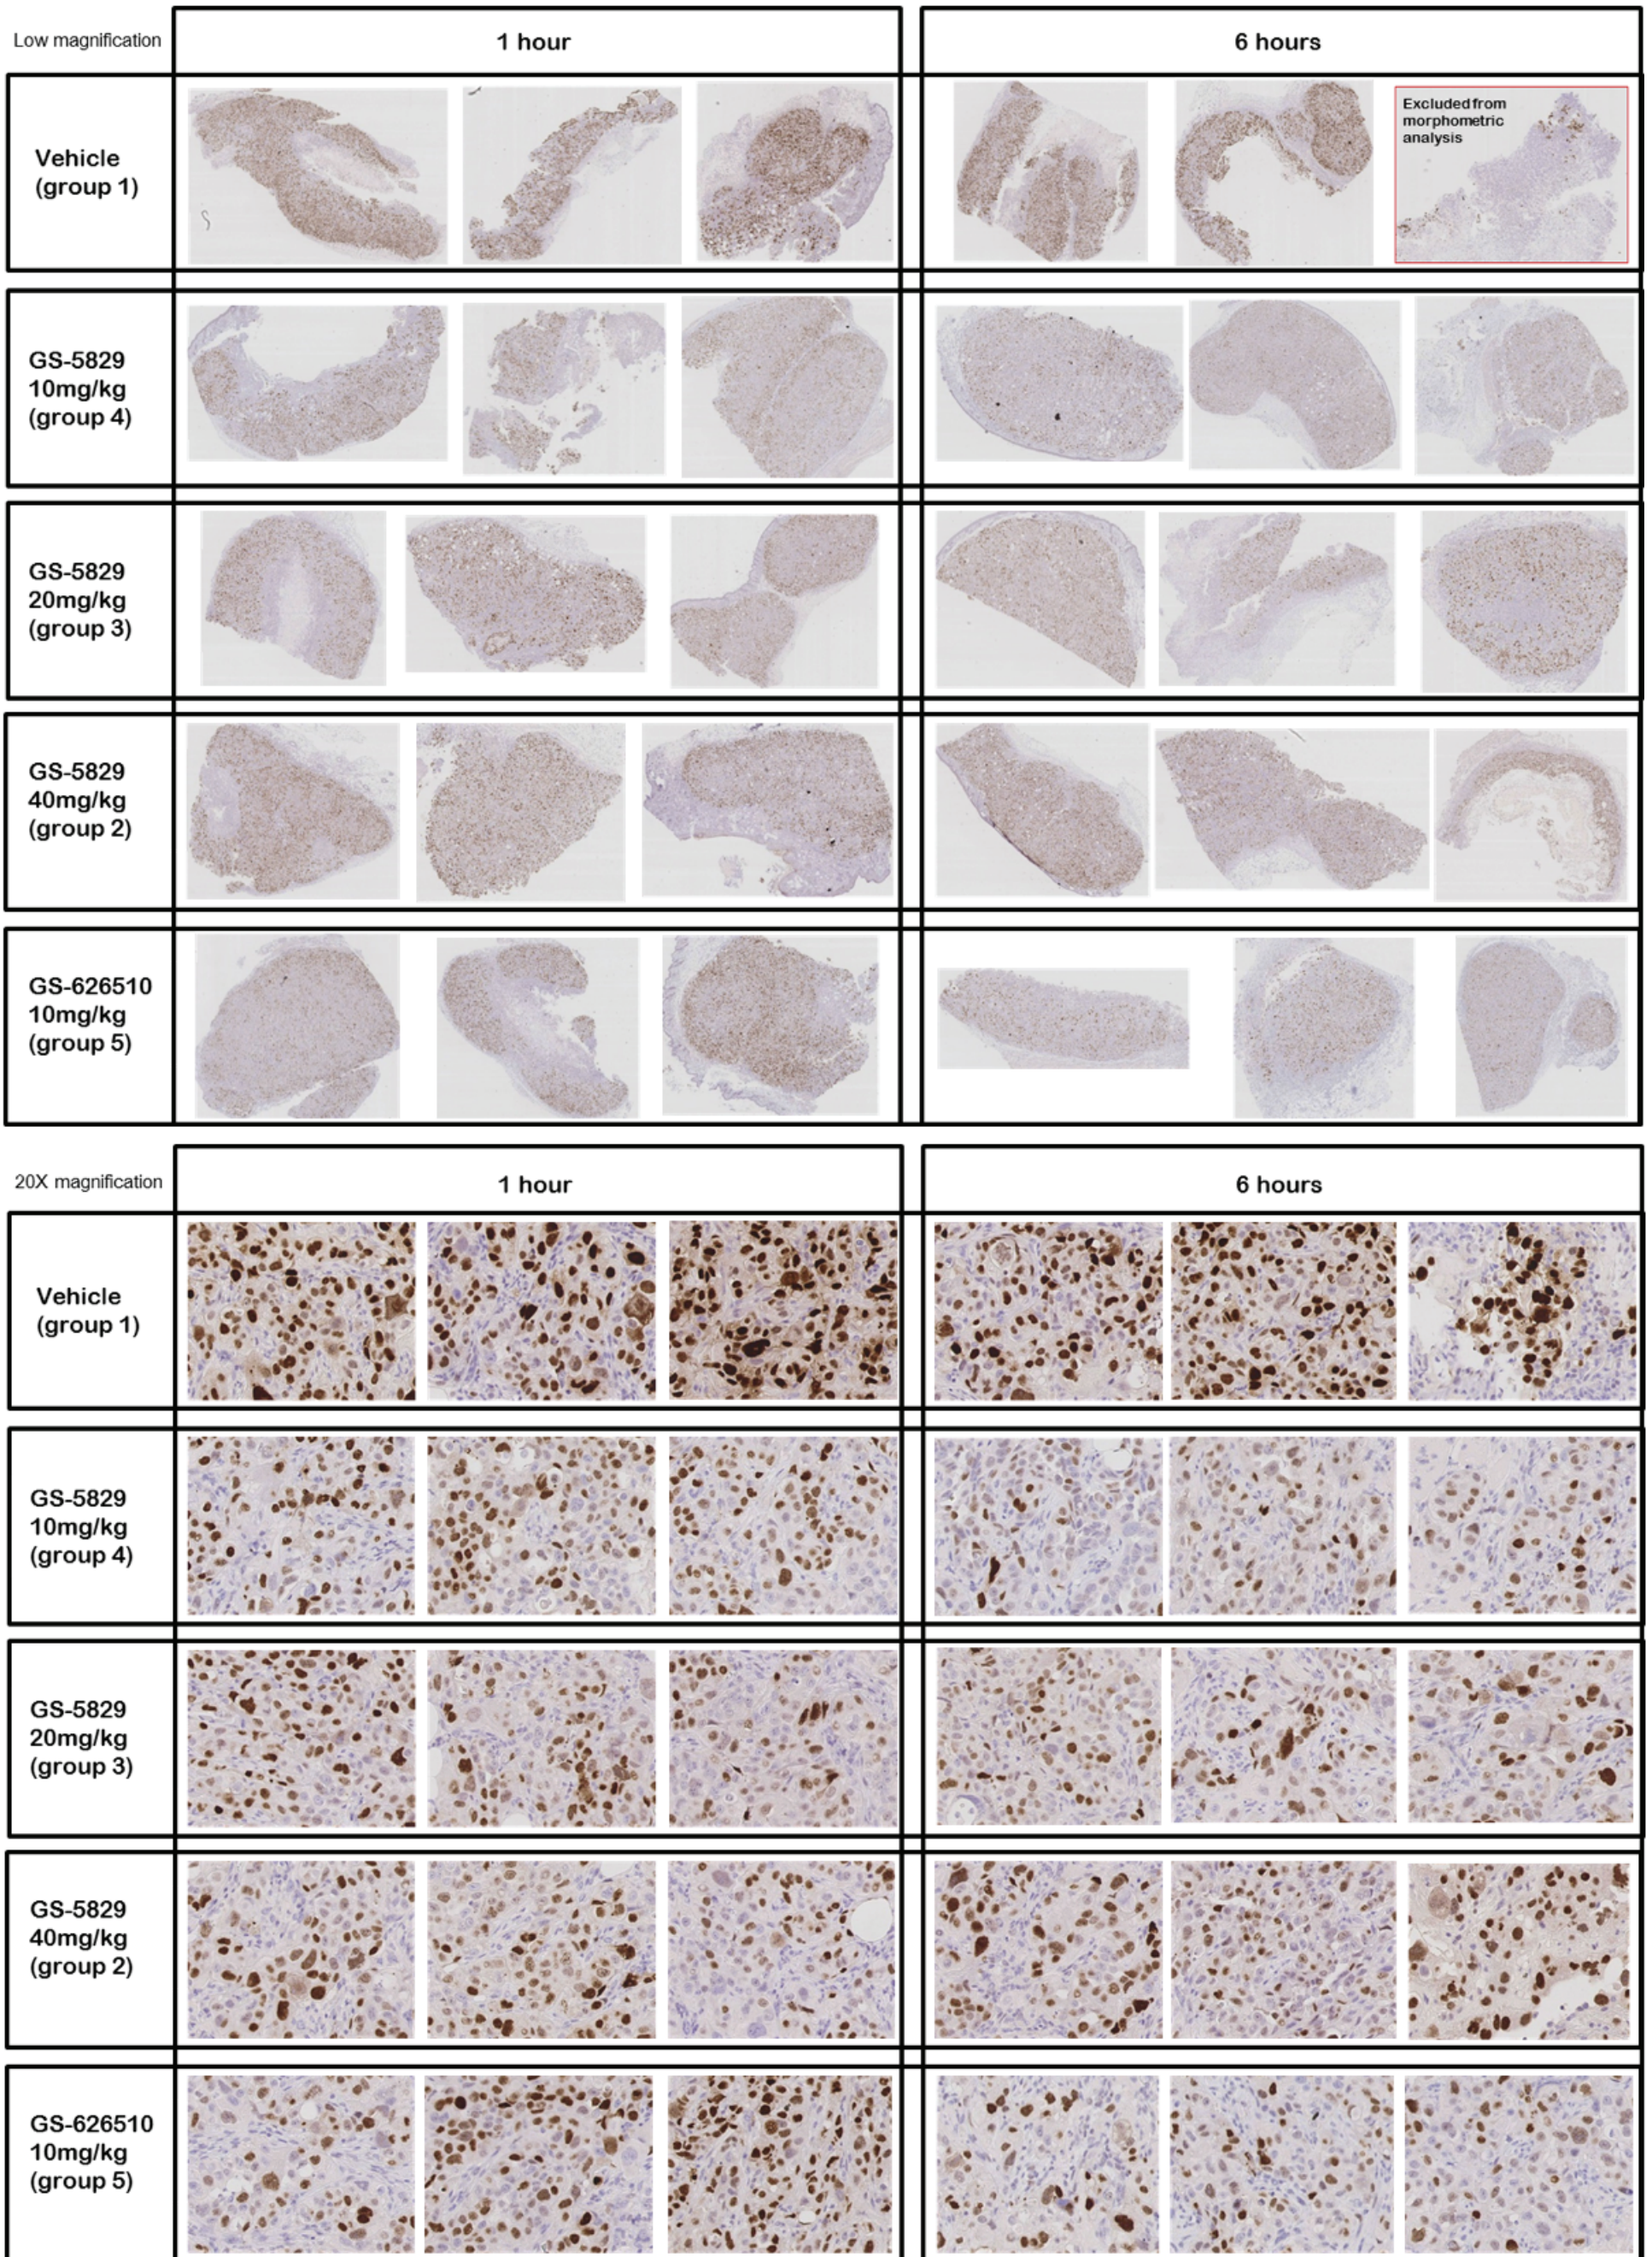

Supplementary Figure S1

Supplement: NIHMS978135-supplement-6.pdf [file NIHMS978135-supplement-6.pdf]

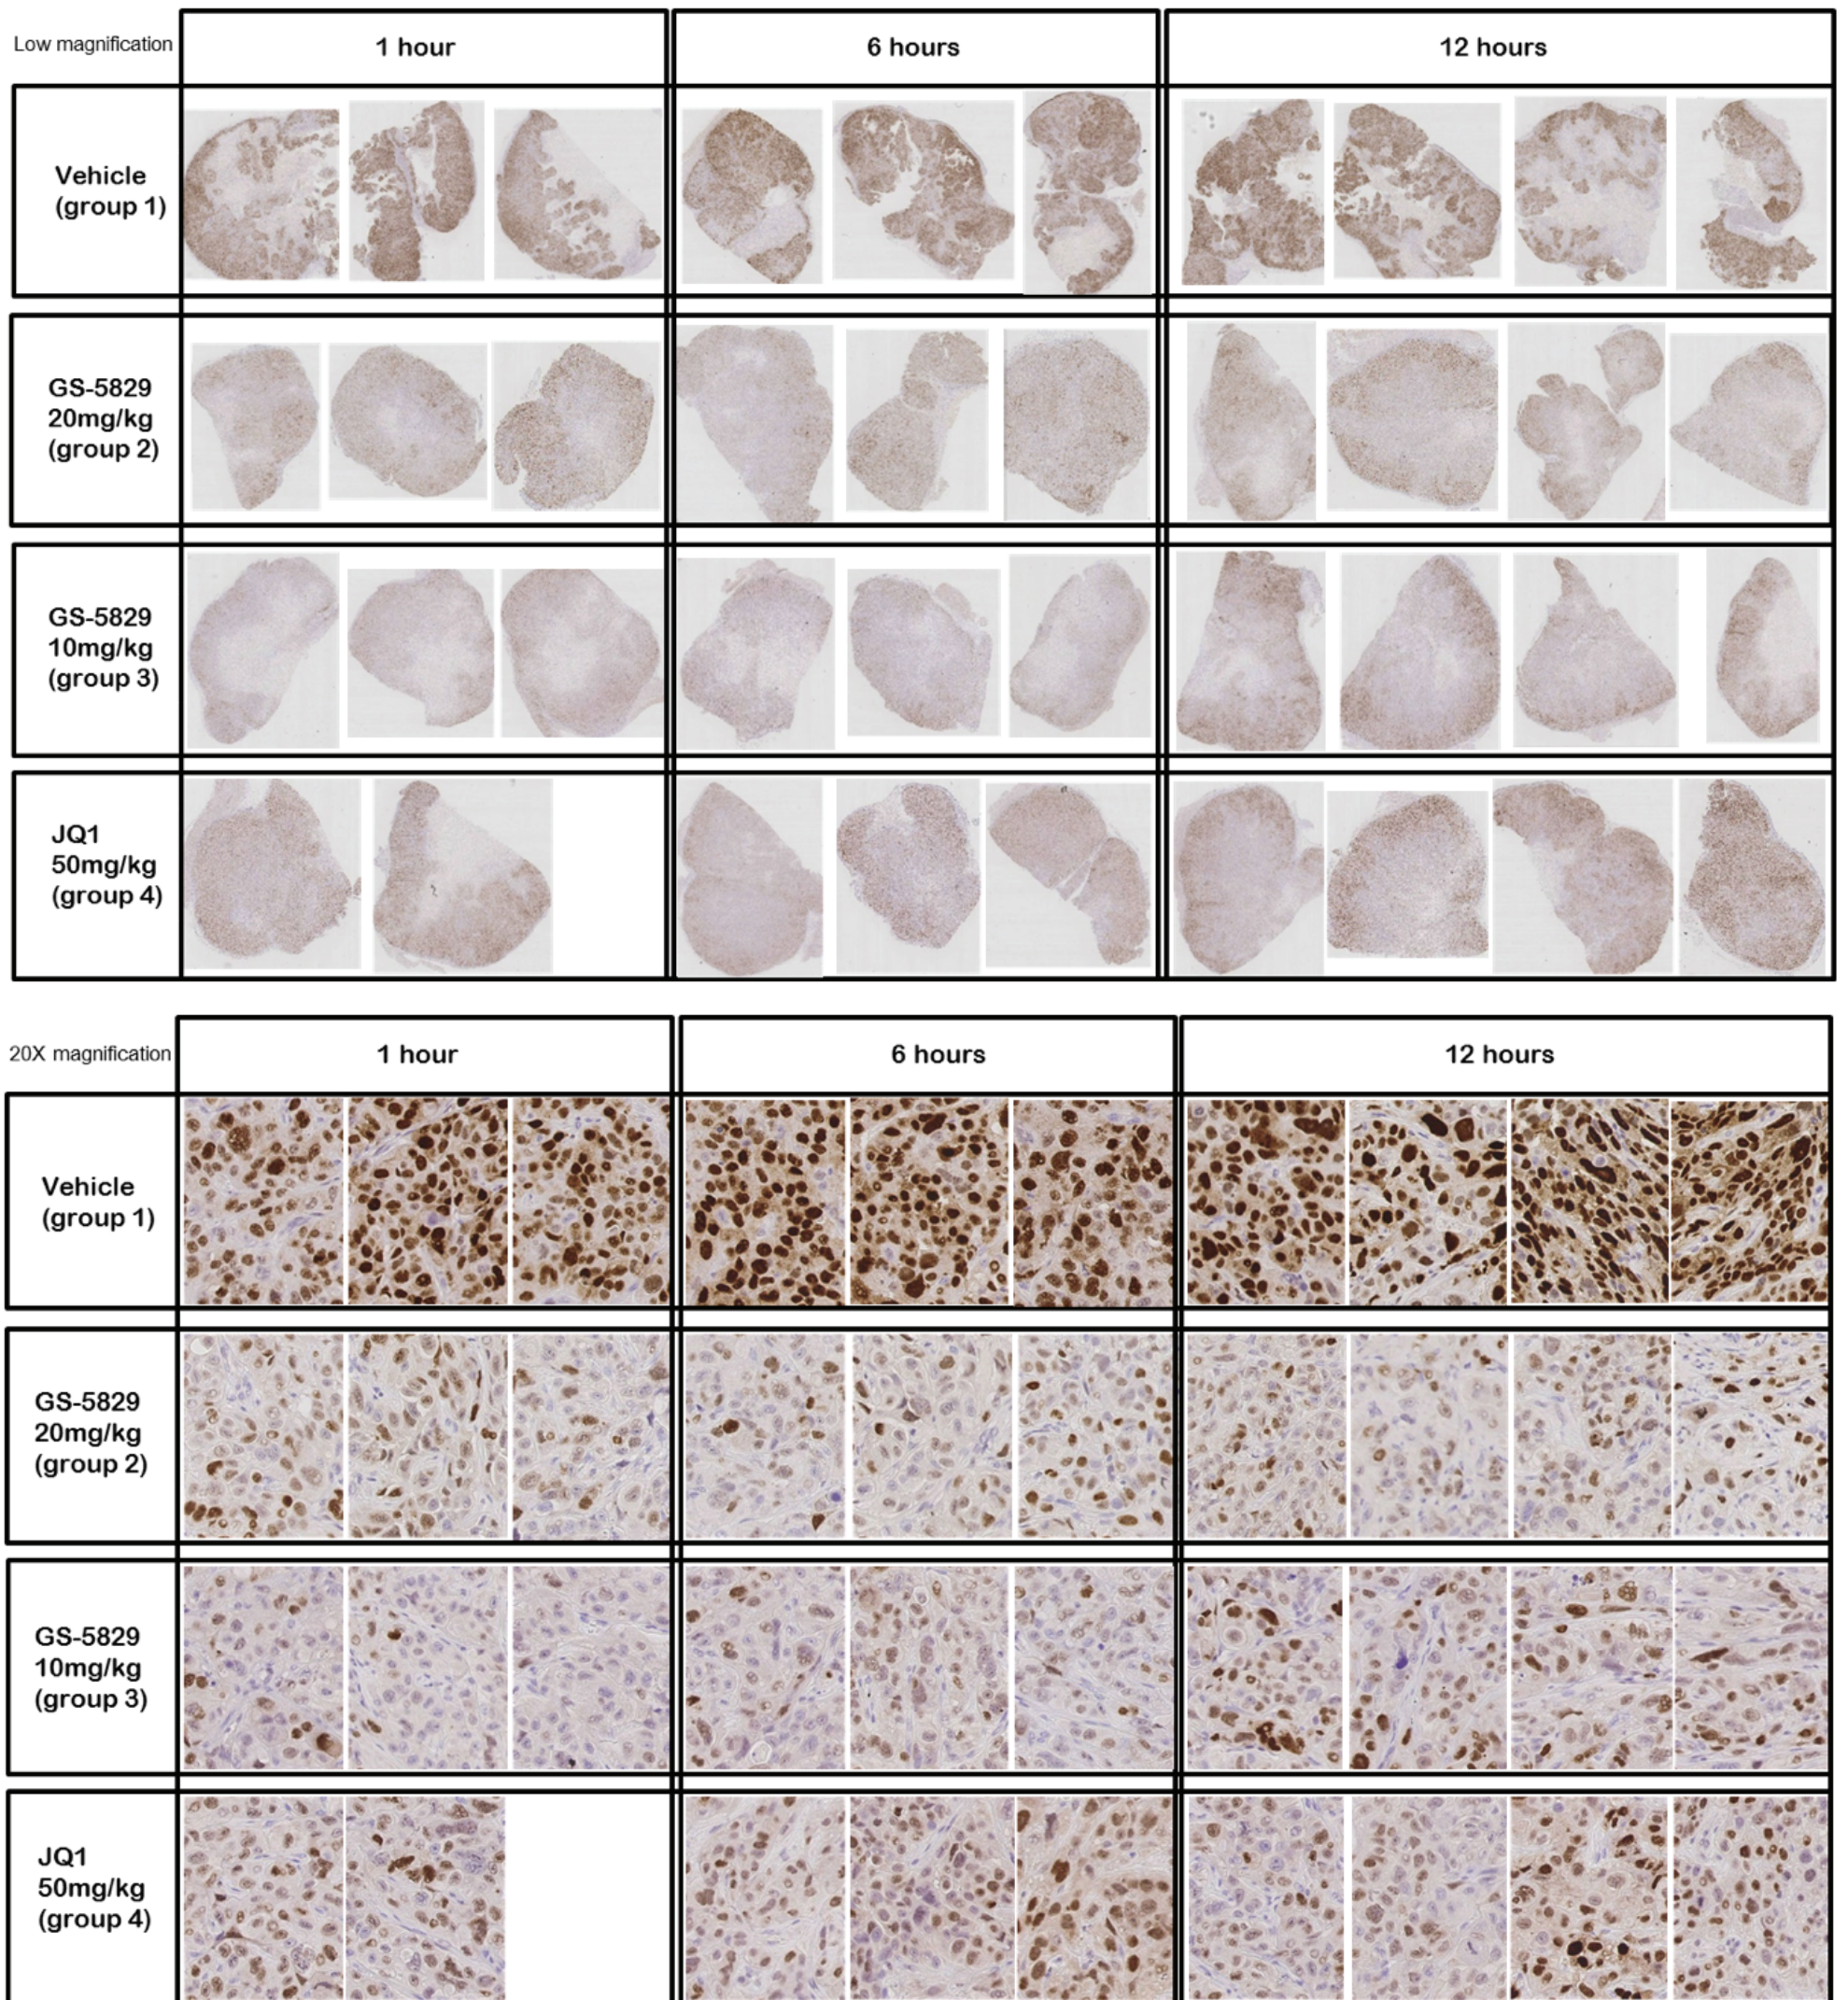

Supplementary Figure S2

Supplement: NIHMS978135-supplement-7.pdf [file NIHMS978135-supplement-7.pdf]
